# Supplementary material
Source: MDPI journal article supplement (https://www.mdpi.com/2075-163X/9/3/150)
Supplement: s1 [file s1]

## Sheet: Dergamysh
All results in Weight Percent
	Dergamysh
	Pyrrhotite-rich diagenites
	Ni	Fe	Co	Cu	S	Total
Mackinawitе	1.9	55.55	4.24	1.7	36.58	99.97	(Melekestseva, 2007)
Mackinawitе	1.72	56.75	4.91	0.03	36.53	99.94	(Melekestseva, 2007)
Mackinawitе	2.44	57.41	3.85	0	36.2	99.9	(Zaykov et al., 2009)
Mackinawitе	1.1	57.37	4.69	0	36.77	99.93	(Zaykov et al., 2009)
	As	Ni	Fe	Co	S	Au	Ag	Cu	Pb	Te	Bi	Sb	Total
Nickeline	56.07	43.23	0.22	0.68	0.1	0.1	0	0.05	0.03	0.02	0.09	0.17	100.75	(Melekestseva, 2007)
Nickeline	56.36	43.86	0.17	0.7	0.13	0.09	0.08	0.04	0	0.04	0.09	0.11	101.68	(Melekestseva, 2007)
Nickeline	56.24	43.47	0.21	0.71	0.15	0	0	0.04	0.18	0.09	0.16	0.1	101.35	(Melekestseva, 2007)
	As	S	Co	Ni	Fe	Au	Ag	Cu	Zn	Pb	Te	Bi	Cr	Sb	Total
Cobaltite	45.92	18.23	23.52	9.51	2.68	0.04	0	0	0.02	0	0.01	0.08	0	0.01	100	(Melekestseva, 2007)
Cobaltite	46.66	18.21	24.06	8.85	3.14	0.16	0	0.04	0.03	0	0.02	0.09	0	0.03	101.29	(Melekestseva, 2007)
Cobaltite	48.41	16.88	23.34	8.73	3.58	0.15	0.07	0.05	0.05	0	0.04	0.16	0.03	0.04	101.54	(Melekestseva, 2007)
Cobaltite	47.56	17.47	21.03	10.22	4.68	0	0.05	0.01	0.04	0.09	0.09	0.09	0	0.04	101.37	(Melekestseva, 2007)
Cobaltite	47.27	17.62	18.37	11.51	5.67	0	0.04	0	0	0	0.05	0.19	0.04	0	100.77	(Melekestseva, 2007)
	Chalcopyrite-rich diagenites
	S	Fe	Co	Ni	Total
Cattierite-pyrite	52.12	24.74	22.76	0.38	100
Cattierite-pyrite	52.15	27.65	20.22	0.28	100.3
Cattierite-pyrite	51.94	22.61	25.08	0.48	100.11
Cattierite-pyrite	51.99	22.78	24.79	0.44	100
	Ag	Au	Total
Native gold	38.93	60.15	99.08
	S	Fe	Co	Ni	Cu	Total
Carrolite	40.65	1.9	37.75	4.4	15.3	100
Carrolite	38.38	6.37	37.79	2.72	14.74	100
	S	Fe	Co	Ni	Cu	Total
Cu-bearing cobaltpentlandite-like (?) mineral	35.74	4.27	50.52	3.51	5.96	100

## Sheet: Yubileynoe
Chemical composition of authigenic minerals of ore diagenites of the Urals VHMS deposits (wt %)
Yubileynoe
Chalcopyrite-rich diagenites
	Au	Ag	Total
Native gold	80.83	19.17	100
Native gold	78.57	21.43	100
Native gold	83.19	16.81	100
Native gold	79.73	20.27	100
Native gold	77.69	22.31	100
	Te	Hg	Total
Coloradoite	41.16	58.84	100
Coloradoite	40.77	59.23	100
Coloradoite	39.96	60.14	100
	Te	Bi	Pb	Total
Tellurobithmutite	47.99	52.01	0	100
Tellurobithmutite	49.02	44.55	6.43	100
Tellurobithmutite	48.94	48.54	2.52	100
	Te	Se	Pb	Total
Altaite	36.65	1.18	62.17	100
Altaite	39.87	0	60.13	100
	Te	Bi	Pb	Total
Rucklidgeite group	47.27	39.44	13.29	100
Rucklidgeite group	45.55	37.5	16.95	100
Rucklidgeite group	45	41.49	13.5	100
	Ag	Te	Total
Stuetzite	63.33	36.67	100
	Te	Ag	Bi	Total
Volynskite	46.56	18.86	34.59	100
Volynskite	45.28	19.51	35.22	100
	Ag	Te	Total
Hessite	63.08	36.92	100
Kawatsulite	Te	Bi	Se	Ag	Total
	45.53	48.82	2.31	3.34	100
	Au	Ag	Hg	Total
Native gold	87.1	11.86	1.04	100
Native gold	85.2	12.99	1.81	100
Bornite-rich diagenites
	Au	Ag	Total
Native gold	69.69	29.45	100
	Fe	Mn	Cu	Zn	Ag	Sb	Te	As	S	Total
Tennantite	0	0.12	43.03	6.8	0.13	2.76	1.01	17.43	27.68	98.96
Tennantite	0	0.13	42.53	7.16	0.21	2.66	1.17	17.46	27.97	99.29
Tennantite	0.63	0.12	42.16	7.07	0	2.88	0.94	17.11	27.87	98.79
Tennantite	0.49	0.11	43.07	6.81	0	2.78	0.96	17.81	28	100.03
Tennantite	0.15	0.12	43.58	6.63	0	2.85	1.04	17.55	27.96	99.87
Tennantite	0.42	0.09	43.3	6.35	0	2.41	1.56	17.33	27.44	98.9
	Cu	Ag	Te	Total
Hessite	2.03	59.87	38.1	100
	S	Cu	Ag	Te	Total
Cervelleite	6.39	11.64	59.13	22.84	100
Sphalerite-rich diagenites
	Fe	Cu	Zn	Sb	As	S	Total
Tennantite	3.5	40.67	5.21	5.16	17.18	27.52	99.23
	3.89	40.57	5.61	4.65	16.6	28.27	99.58
	2.99	41.09	5.42	5.12	17.37	27.53	99.52
	2.21	40.29	5.91	7.5	15.21	28.01	99.13
	2.84	40.84	5.29	3.26	18.96	27.87	99.06
Pyrite-rich diagenites
	Ag	Te	Au	Total
Petzite	42.31	33.7	24	100.01
Petzite	42.38	33.88	23.74	100
Petzite	41.94	33.61	24.45	100
	Ag	Au	Total
Native gold	12.05	87.95	100
Native gold	14.96	85.04	100
Native gold	9.52	90.48	100
	Ag	Te	Total
Hessite	62.84	37.16	100
Hessite	62.29	37.71	100
Hessite	61.94	37.16	99.1
Hematite-rich
	S	Fe	Cu	Se	Ag	Te	Total
Cervelleite	5.94	0.81	5.83	1.14	64.65	21.63	100
Cervelleite	5.8	0.72	5.47	2.82	63.85	21.35	100
	Ag	Au	Total
Native gold	50.24	49.76	100
Native gold	37	63	100
Native gold	56.51	43.49	100
Native gold	39.08	60.92	100
	Ag	Se	Te	Pb	Total
Altaite	0	1.18	36.65	62.17	100
Altaite	0	0	37.77	62.31	100.08
Altaite	1.05	0	38.06	60.01	99.12
Altaite	0	0	37.83	61.68	99.51
Altaite	1.46	0	38.04	60.25	99.75
	Se	Ag	Te	Total
Hessite	0	63.33	36.67	100
Hessite	0.91	62.91	36.18	100
Hessite	0	62.06	37.14	99.2
	Fe	Cu	Zn	Sb	As	S	Total
Tennantite	1.06	42.64	7.11	0	20.39	28.81	100
Tennantite	2.32	43.03	5.13	1.44	19.3	27.98	99.2
Tennantite	1.99	43.92	5.03	1.67	18.75	28.23	99.59
Tennantite	1.52	43.7	5.31	1.03	19.72	27.93	99.21
	Te	Pb	S	Se	Total
Se-galena	1.36	83.02	8.59	7.04	100.01
Se-galena	4.49	81.86	9.12	3.54	99.01
Se-galena	0	85.12	11.31	2.88	99.31
Se-galena	0	85.01	11.1	3.02	99.13
	Ag	Te	Pb	Bi	S	Total
Phase of ruckidgeite group	0	47.23	8.36	43.5	0	99.09
Phase of ruckidgeite group	1.1	47.54	15.67	34.73	0	99.03
Phase of ruckidgeite group	2.25	44.76	30.18	21.9	0	99.08
Phase of ruckidgeite group	0	35	39.88	22.03	3.09	100
	Te	Bi	Summ
Tellurobithmutite	47.66	52.34	100
Tellurobithmutite	47.39	52.61	100

## Sheet: Yaman-Kasy
Yaman-Kasy
Calcopyrite-rich diagenite
	Au	Ag	Hg	Total
Native gold	76.59	15.87	2.83	99.89
Native gold	83.86	12.16	0.68	100.02
Native gold	74.42	16.04	4.73	99.92
Native gold	83.14	12.15	0	99.96
Native gold	79.47	20.53	0	100
Native gold	71.45	28.55	0	100
Native gold	75.45	24.55	0	100
Native gold	80.85	19.15	0	100
Native gold	80.37	19.63	0	100
Native gold	83.69	16.31	0	100
Native gold	83.53	16.47	0	100
Native gold	83.95	16.05	0	100
Native gold	76.44	23.56	0	100
Native antimony	Sb	Pb	Total
	100.11	0.29	100.4
	Te	Bi	Total
Tellurobithmutite	48.62	50.42	99.04
	48.78	50.43	99.21
Hematite-rich diagenites
Yaman-Kasy
	Au	Ag	Total
Native gold	82.2	17.8	100
Native gold	82.61	17.39	100
Native gold	82.2	17.18	100
Native gold	78.05	21.95	100
Native gold	84.2	15.71	99.91
Native gold	82.61	17.39	100
Native gold	81.68	17.74	99.42
Native gold	84.2	15.71	99.91
Native gold	81.68	17.74	99.42
	S	Cu	As	Sb	Te	Total
Enargite	33.89	47.62	17.47	1.02	0.00	100.00
Enargite	33.52	47.42	17.73	0.89	0.44	100.00
Enargite	35.82	46.80	16.51	0.87	0.00	100.00
Enargite	35.16	47.06	15.96	1.82	0.00	100.00
Enargite	35.18	46.77	16.80	1.25	0.00	100.00
	Te	Pb	Bi	Total
Tellurobithmutite	37.35	5.32	57.03	99.69
Tellurobithmutite	37.60	6.48	55.62	99.70
Tellurobithmutite	47.67	0	52.33	100

## Sheet: Molodezhnoe
Molodezhnoe
Chalcopyrite-rich diagenite
	S	Fe	Cu	Zn	As	Sb	Te	Bi	Total
Tennantite	27.77	1.32	40.22	6.43	18.38	3.9	0	1.98	100
Tennantite	27.99	1.35	40.73	6.39	18.43	4.89	0.23	0	100
	Ag	Te	Total
Hessite	61.58	37.44	99.03
Hessite	62.12	37.14	99.26
Hessite	61.9	37.73	99.62
Hessite	61.89	37.3	99.19
	Ag	Te	Au	Total
Petzite	41.64	33.52	24.84	100
	Te	Hg	Total
Coloradoite	37.48	62.52	100
Coloradoite	37.51	62.49	100
	Ag	Au	Total
Native gold	15.74	84.26	100
	S	Se	Pb	Total
Galena	12.7	1.46	85.54	99.7
	Ag	Se	Total
Naumannite*	73.73	26.27	100	(Ayupova et al., 2017)
Naumannite*	73.26	26.74	100	(Ayupova et al., 2017)
Naumannite*	73.93	26.07	100	(Ayupova et al., 2017)
Naumannite*	71.02	26.39	97.41	(Ayupova et al., 2017)
Naumannite*	72.85	27.01	99.86	(Ayupova et al., 2017)
Naumannite*	72.33	26.67	99	(Ayupova et al., 2017)
Naumannite*	73.15	26.85	100	(Ayupova et al., 2017)
	Pb	Ag	Se	Total
Clausthalite*	72.32	0	27.68	100	(Ayupova et al., 2017)
Clausthalite*	66.04	6.01	27.95	100	(Ayupova et al., 2017)
Clausthalite*	67.9	3.4	28.71	100.01	(Ayupova et al., 2017)
Clausthalite*	67.35	3.41	29.24	100	(Ayupova et al., 2017)
Clausthalite*	66.23	4.87	28.9	100	(Ayupova et al., 2017)
Clausthalite*	67.51	3.39	29.11	100.01	(Ayupova et al., 2017)
Clausthalite*	64.57	6.73	28.7	100	(Ayupova et al., 2017)
	Pb	Se	Cu	In	Fe	S	Total
Roquesite	2.28	1.45	22.11	46.43	1.42	26.28	99.97	(Ayupova et al., 2015)
Roquesite	4.02	2.3	21.12	45.37	2.82	23.96	99.59	(Ayupova et al., 2015)
Roquesite*	0	4.47	25.76	44.6	1.53	23.64	100	(Ayupova et al., 2015)
Roquesite*	0	2.91	26.6	41.88	3.54	25.07	100	(Ayupova et al., 2015)
Roquesite*	2.28	1.45	22	46.41	1.42	26.27	99.83	(Ayupova et al., 2015)
	Ag	Se	Te	Total
Kurilite	69.78	23.27	6.61	99.66	(Ayupova et al., 2015)
Kurilite	69.88	18.17	11.96	100.01	(Ayupova et al., 2015)
Kurilite	69.98	16.26	12.57	98.81	(Ayupova et al., 2015)
Kurilite	68.69	19.32	11.95	99.96	(Ayupova et al., 2015)
Kurilite	69.41	16.64	13.95	100	(Ayupova et al., 2015)
	Ag	Se	Bi	Total
Bohdanowiczite	22.32	31.58	46.09	99.99	(Ayupova et al., 2015)
Bohdanowiczite	23.69	32.09	44.23	100.01	(Ayupova et al., 2015)
Bornite-rich diagenites
	S	Fe	Cu	Zn	As	Ag	Sb	Te	Total
Tennantite	26.13	1.04	48.72	1.98	16.7	0.39	1.22	3.65	99.83
Tennantite	27.38	1.07	47.3	2.1	16.39	0.51	1.09	3.5	99.33
Tennantite	26.92	1.07	48.16	2.02	17.22	0.31	1.46	2.71	99.88
Tennantite	26.85	1.03	47.69	2.12	16.72	0.58	1.45	3.2	99.65
Native gold	S	Fe	Cu	Zn	Ag	Te	Au	Bi	Total
Native gold	0.33	0	0	0.88	20.97	0.08	76.22	0.59	99.41
Native gold	0.25	0.01	0	0.07	19.71	0.02	78.35	0.59	99.1
Native gold	0.31	0.04	0.05	0.24	19.91	0.09	77.65	0.83	99.25
Native gold	0.38	0	0.06	1.2	20.65	0	76.54	0.68	99.65
Native gold	0.35	0.13	0.97	0.13	23.71	0.1	72.61	0.65	98.84
	Cu	Ag	Sb	As	S	Fe	Zn	Cd	Hg	Сумма
Ag-rich tetrahedrite–tennantite	29.7	11.18	17.03	7.41	24.35	1.57	2.66	1.98	4.12	100
	Pb	Ag	Cu	Sb	S	Сумма
Diaphorite	26.84	25.02	0.58	27.7	19.02	99.16
	Pb	As	Sb	S	Сумма
Jordanite	69.46	10.49	2.24	18.38	100.58
Jordanite	69.37	10.4	2.13	18.5	100.4
Jordanite	67.74	11.18	1.35	18.87	99.14
Jordanite	68.01	11.26	1.45	18.58	99.31
Jordanite	66.42	9.96	3.84	19.78	100
	Cu	Ag	Sb	As	S	Сумма
Polybasite	10.44	61.95	7.21	2.47	17.93	100
	Sphalerite-rich diagenites
	Te	Pb	Total
	38.31	61.69	100
Altaite	38.18	61.82	100
	37.87	62.13	100
	S	Se	Pb	Total
Galena	12.99	0.78	86.23	100
	S	Fe	Cu	Zn	As	Sb	Bi	Total
Tennantite	27.8	1.26	40.55	6.48	17.93	4.68	1.29	100
Hematite-rich diagenites
	Bi	Ag	Te	S	Total
Tetradymite	59.05	0.67	36.39	3.9	100.02	(Ayupova, Maslennikov, 2018)
Galena	Pb	Fe	Se	S	Total
	83.82	0.87	2.04	12.5	99.22	(Ayupova, Maslennikov, 2018)
	82.58	1.6	2.61	12.38	99.17	(Ayupova, Maslennikov, 2018)
	84.87	0.84	1.97	12.72	100.4	(Ayupova, Maslennikov, 2018)
Hessite	Ag	Te	Total
	62.55	38.02	100.58	(Ayupova, Maslennikov, 2018)
	62.55	37.89	100.44	(Ayupova, Maslennikov, 2018)
Tellurobismuthite	Bi	Te	Total
	52.36	47.51	99.87	(Ayupova, Maslennikov, 2018)
	52	47.9	100	(Ayupova, Maslennikov, 2018)
Coloradoite	Hg	Te	Total
	61.56	38.44	100	(Ayupova, Maslennikov, 2018)
	60.88	38.31	99.19	(Ayupova, Maslennikov, 2018)
Volynskite	Bi	Ag	Fe	Te	Total
	40.91	15.03	0	44.06	100	(Ayupova, Maslennikov, 2018)
	35.89	18.07	1.12	44.97	100.05	(Ayupova, Maslennikov, 2018)
Tsumoite	Bi	Te	Total
	61.97	38.84	100.81	(Ayupova, Maslennikov, 2018)

## Sheet: Valentorskoe
Valentorskoe
Chalcopyrite-rich diagenites
	S	Fe	Cu	Zn	As	Sb	Te	Bi	Total
Tennantite	26.29	0.53	42.27	7.61	11.44	3.42	8.11	0.33	100
Tennantite	26.01	0	43.61	5.2	12.76	3.7	7.28	1.44	100
Tennantite	25.63	0.47	45.9	3.15	12.43	1.24	10.1	1.09	100
	S	Se	Pb	Total
Galena	13.48	1.51	84.74	99.73
	Ag	Au	Total
Native gold	32.66	67.65	100.31
	S	Cu	Ag	Te	Total
Hessite	0.39	0	62.02	37.43	99.84
Hessite	0	0.85	61.22	37.93	100
Bornite-rich diagenites
	S	V	Mn	Fe	Cu	Zn	Ge	As	Bi	Sn	Total
Colusite	31.48	2.62	0.25	0.42	45.3	6.92	3.43	9.81	0	0	100.23
Colusite	31.42	2.86	0	1.3	49.26	1.52	2.89	10.76	0	0	100
Colusite	31.01	2.35	0.22	0.61	42.45	9.55	3.26	9.42	1.14	0	100
Colusite	30.55	2.92	0	0.46	49.04	3.33	2.77	10.58	0	0.35	100
Colusite	31.01	2.79	0	0.21	48.17	4.1	3.88	9.84	0	0	100
	S	Fe	Cu	As	Se	Sb	Te	Ag	Pb	Total
Galena	13.1259	0.1601	1.8114	0.0267	1.1184	0.0344	0.0447	0.1556	85.3096	101.787
Galena	13.0492	0.8204	1.4336	0.0215	1.4174	0	0.0473	0.0401	85.7397	102.569
Galena	13.0773	0.6724	1.465	0.0026	1.512	0	0.0445	0.0838	85.2997	102.157
Galena	13.1105	0.829	1.1712	0.0171	1.4158	0	0.046	0.1093	85.3597	102.059
Galena	13.0968	1.0358	0.1291	0.0118	1.4425	0	0.0373	0.1514	85.1442	101.049
Galena	13.1634	0.775	0.2525	0.0142	1.4601	0	0.0659	0.1016	84.6955	100.528
Galena	13.2346	0.9533	0.3967	0.014	1.4809	0.018	0.0546	0.1015	84.7468	101
	S	Fe	Cu	Zn	As	Se	Sb	Bi	Te	Ag	Total
Goldfieldite-tennantite	26.1696	0.0894	47.3961	0.0996	8.1071	0.182	0.3874	0.7112	17.102	0.5537	100.811
Goldfieldite-tennantite	26.2074	0.0375	47.1571	0.4905	8.6923	0.189	0.3424	0.6119	16.0689	0.8871	100.693
Goldfieldite-tennantite	26.4838	0.0369	47.1825	0.5672	8.8722	0.1528	0.2977	0.5396	15.9375	0.7634	100.854
Goldfieldite-tennantite	26.9878	0.0811	45.4905	2.8734	11.7146	0.1075	0.5156	0.8922	10.8538	0.6946	100.233
Goldfieldite-tennantite	26.4501	1.1488	46.5034	2.4295	10.868	0.0942	0.4222	0.8954	11.3995	0.5633	100.79
Goldfieldite-tennantite	26.3231	0.3271	47.348	0.3655	8.5549	0.1453	0.2933	0.779	16.4548	0.5048	101.097
Goldfieldite-tennantite	26.072	0.2337	47.1377	0.3189	7.9339	0.1492	0.3029	1.2367	16.4026	0.8355	100.696
Goldfieldite-tennantite	25.9835	0.2705	47.2036	0.6613	8.5688	0.1249	0.3629	0.4705	15.6286	0.8391	100.116
Goldfieldite-tennantite	25.6482	0.4188	46.8813	1.533	9.9399	0.0985	0.4776	0.4458	13.5254	0.6124	99.6032
Goldfieldite-tennantite	26.3701	0.205	47.1114	0.4295	8.5628	0.1278	0.2909	0.6949	16.3826	1.0359	101.226
Goldfieldite-tennantite	26.6279	0.1376	47.1107	0.6961	9.1912	0.1689	0.19	0.5763	15.7347	0.7196	101.167
Goldfieldite-tennantite	26.1569	0.096	47.5381	0.1016	8.1802	0.1614	0.2377	0.9357	17.1274	0.3873	100.936
Goldfieldite-tennantite	26.4385	0.1048	47.51	0.203	8.334	0.1538	0.2321	0.8702	16.8327	0.7259	101.424
Goldfieldite-tennantite	26.4529	0.094	47.3064	0.6299	9.0179	0.1363	0.2532	0.7216	15.8953	0.7356	101.263
Goldfieldite-tennantite	26.808	0.5307	46.9096	1.1151	9.815	0.171	0.2699	0.6103	15.1372	0.5619	101.97
Goldfieldite-tennantite	26.5677	0.3627	46.8649	0.5518	9.001	0.1703	0.3047	0.6905	16.0585	1.2408	101.872
Goldfieldite-tennantite	26.6541	0.8549	47.4474	1.1855	9.7102	0.1752	0.3532	0.5106	14.5894	0.3581	101.86
Goldfieldite-tennantite	26.9175	0.5846	47.1911	1.41	10.1075	0.1451	0.2529	0.494	14.1085	0.4203	101.639
Goldfieldite-tennantite	26.6415	0.5868	47.5394	0.7531	9.3218	0.1572	0.2793	0.6012	15.6056	0.2882	101.791
Goldfieldite-tennantite	26.7256	0.547	46.8669	1.525	10.0671	0.1267	0.4444	0.5	13.888	0.5822	101.276
Goldfieldite-tennantite	26.8071	0.3877	46.5603	1.9034	10.6282	0.1258	0.4632	0.5457	13.0816	0.5343	101.043
Goldfieldite-tennantite	27.0168	0.3596	46.5104	2.2852	10.8001	0.1037	0.48	0.5638	12.2244	0.4613	100.817
Goldfieldite-tennantite	26.3864	0.3628	47.0823	0.7993	9.0219	0.1872	0.3135	0.7899	15.4666	0.6947	101.121
Goldfieldite-tennantite	26.5096	0.4722	47.3107	0.7403	8.8562	0.1904	0.3571	0.7425	15.4961	0.4062	101.113
Goldfieldite-tennantite	26.3487	0.1857	47.3083	0.5085	8.5569	0.1461	0.2868	0.5759	16.3365	0.7038	100.977
Goldfieldite-tennantite	26.6471	0.1016	47.3575	0.758	9.0967	0.1546	0.278	0.5747	15.6382	0.5481	101.172
Goldfieldite-tennantite	26.54	0.0906	47.0814	0.9778	9.2824	0.1522	0.2442	0.4332	15.2532	0.62	100.69
Goldfieldite-tennantite	26.4432	0.08	47.0823	0.7711	8.9957	0.1576	0.3156	0.7682	15.517	0.6062	100.754
Goldfieldite-tennantite	26.5588	0.1544	47.2706	0.7408	9.0214	0.1559	0.2723	0.5386	15.6778	0.6441	101.049
Goldfieldite-tennantite	26.6467	0.1188	47.2599	0.7815	9.2566	0.1551	0.3065	0.4771	15.4905	0.5491	101.047
Goldfieldite-tennantite	26.5581	0.1103	47.0946	0.8492	8.9656	0.1451	0.2884	0.6988	15.3901	0.5348	100.648
Goldfieldite-tennantite	26.6435	0.1531	46.9748	1.0262	9.5355	0.1349	0.2504	0.6391	14.9867	0.5072	100.859
Goldfieldite-tennantite	26.9458	0.3122	46.6349	1.8067	10.4333	0.1557	0.2075	0.6008	13.1404	0.5521	100.798
Goldfieldite-tennantite	26.3549	0.5212	47.0614	0.9383	8.9067	0.1243	0.2793	0.6448	15.4363	0.7207	101.001
Goldfieldite-tennantite	27.1862	0.3872	47.8368	0.8447	9.0464	0.1432	0.3243	0.7422	15.4265	0.331	102.279
Goldfieldite-tennantite	26.0568	0.3286	47.7371	0.9502	8.0138	0.1279	0.3351	0.7927	15.6087	0.1871	100.147
Goldfieldite-tennantite	27.05	0.3696	47.5663	0.7979	8.8074	0.1303	0.3062	0.6197	15.727	0.463	101.856
Goldfieldite-tennantite	26.4826	0.2681	47.3006	0.4204	8.615	0.1614	0.2602	0.6903	16.27	0.4322	100.927
Goldfieldite-tennantite	26.5088	0.1679	47.3702	0.475	8.6192	0.1517	0.2467	0.6957	16.2925	0.342	100.945
Goldfieldite-tennantite	26.4681	0.1297	47.3681	0.395	8.5402	0.1445	0.2582	0.6485	16.4987	0.3542	100.842
Goldfieldite-tennantite	26.5309	0.1513	47.5275	0.3528	8.5125	0.1598	0.2717	0.612	16.4917	0.3617	100.987
Goldfieldite-tennantite	26.6003	0.2777	47.4008	0.4452	8.6862	0.1363	0.2869	0.5613	16.2327	0.4905	101.195
Goldfieldite-tennantite	26.914	0.5757	46.7268	1.6782	10.3119	0.1283	0.4606	0.5149	13.5301	0.5497	101.397
Goldfieldite-tennantite	26.3733	0.3655	47.2625	0.677	8.9778	0.1201	0.3213	0.5687	15.6988	0.3854	100.77
Goldfieldite-tennantite	26.5592	0.343	47.6692	0.2666	8.5838	0.1337	0.2824	0.6243	16.6274	0.3181	101.425
Goldfieldite-tennantite	26.552	0.3937	47.5059	0.5013	8.7978	0.149	0.2945	0.9163	16.1042	0.3543	101.596
Goldfieldite-tennantite	26.6565	0.5362	47.5152	0.6407	8.8483	0.1423	0.3193	1.1481	15.7487	0.4421	102.028
	S	Fe	Cu	Se	Sb	Bi	Ag	Total
Wittichenite	19.9565	0.9239	37.9487	0.0257	0.0165	43.4918	0.7219	103.085
Wittichenite	19.4808	1.4114	36.2449	0.0307	0	43.2815	0.733	101.182
	Ag	Au	Hg	Total
Native gold	29.9045	71.3495	1.4056	102.66
Native gold	28.8497	70.7851	2.9774	102.612
Native gold	24.923	74.8225	1.9672	101.713
Native gold	24.7063	75.3542	1.9451	102.006
Native gold	24.5884	75.7333	2.0992	102.421
Native gold	24.3193	76.0206	2.0083	102.348
Native gold	24.1598	75.7458	1.9632	101.869
Native gold	23.9806	77.2073	2.0226	103.21
Native gold	23.8722	76.6998	2.0082	102.58
Native gold	23.8591	75.4803	1.9118	101.251
Native gold	23.7935	76.3114	1.9858	102.091
Native gold	23.7458	76.0835	1.9985	101.828
Native gold	23.7064	76.3745	1.9691	102.05
Native gold	23.6759	75.2036	1.944	100.823
Native gold	23.6738	77.1317	2.0007	102.806
Native gold	23.5837	76.3597	1.9127	101.856
Native gold	23.5577	74.9887	1.9622	100.509
Native gold	23.554	75.1321	1.9113	100.597
Native gold	23.5428	75.44	1.9874	100.97
Native gold	23.4497	76.7692	2.0779	102.297
Native gold	23.4168	75.7502	1.9459	101.113
Native gold	23.3608	76.6931	2.0134	102.067
Native gold	23.3493	76.82	1.9095	102.079
Native gold	23.3329	75.9858	1.998	101.317
Native gold	23.2684	76.8211	1.9916	102.081
Native gold	23.2352	75.0861	1.9885	100.31
Native gold	23.169	76.4758	1.987	101.632
Native gold	23.1432	75.4704	2.0113	100.625
Native gold	23.0372	75.7212	1.9491	100.707
Native gold	23.0222	76.519	1.9476	101.489
Native gold	22.9558	75.7145	1.9327	100.603
Native gold	22.9332	75.6514	1.9991	100.584
Native gold	22.8887	76.1287	2.0461	101.063
Native gold	22.8596	77.1641	2.0419	102.066
Native gold	22.8462	77.1625	1.9901	101.999
Native gold	22.7132	75.6851	1.964	100.362
Native gold	23.8591	75.4803	1.9118	101.251
Native gold	23.5428	75.44	1.9874	100.97
Native gold	22.7132	75.6851	1.964	100.362
Native gold	26.6049	72.6948	1.7869	101.087
Native gold	22.9332	75.6514	1.9991	100.584
Native gold	22.9558	75.7145	1.9327	100.603
Native gold	23.0222	76.519	1.9476	101.489
Native gold	23.0372	75.7212	1.9491	100.707
Native gold	22.8462	77.1625	1.9901	101.999
Native gold	22.8887	76.1287	2.0461	101.063
Native gold	22.8596	77.1641	2.0419	102.066
Native gold	23.554	75.1321	1.9113	100.597
Native gold	23.169	76.4758	1.987	101.632
Native gold	25.3135	73.2675	1.8559	100.437
Native gold	23.6572	77.0388	1.994	102.69
Native gold	23.5577	74.9887	1.9622	100.509
Native gold	23.2684	76.8211	1.9916	102.081
Native gold	23.7935	76.3114	1.9858	102.091
Native gold	23.3493	76.82	1.9095	102.079
Native gold	23.6759	75.2036	1.944	100.823
Native gold	24.3263	76.4261	1.8889	102.641
Native gold	24.1598	75.7458	1.9632	101.869
Native gold	23.3608	76.6931	2.0134	102.067
Native gold	23.4497	76.7692	2.0779	102.297
Native gold	23.1432	75.4704	2.0113	100.625
Native gold	23.3329	75.9858	1.998	101.317
Native gold	23.4168	75.7502	1.9459	101.113
Native gold	23.7064	76.3745	1.9691	102.05
Native gold	23.2352	75.0861	1.9885	100.31
Native gold	23.5837	76.3597	1.9127	101.856
Native gold	23.7458	76.0835	1.9985	101.828
Native gold	24.923	74.8225	1.9672	101.713
Native gold	24.7063	75.3542	1.9451	102.006
Native gold	28.8497	70.7851	2.9774	102.612
Native gold	22.7862	74.8804	1.9261	99.5927
Native gold	23.1011	75.2788	1.9693	100.349
Native gold	24.7666	73.5526	1.873	100.192
Native gold	47.5688	52.3858	1.3059	101.26
Native gold	47.5688	52.3858	1.3059	101.26
	S	Cu	Te	Ag	Total
Cervelleite	8.3331	11.922	24.1344	56.8684	101.258
Cervelleite	7.6903	13.8925	26.2397	55.1879	103.01
Cervelleite	7.8611	14.187	25.8937	52.9559	100.898
Cervelleite	8.5032	16.0502	26.2807	51.3822	102.216
Cervelleite	8.1751	16.1453	26.3995	49.9529	100.673
Cervelleite	8.5981	16.6098	25.3929	49.9524	100.553
Cervelleite	9.0588	18.4175	26.844	46.9631	101.283
Cervelleite	9.1869	17.9965	27.791	46.9628	101.937
Cervelleite	8.3331	11.922	24.1344	56.8684	101.258
Cervelleite	9.0588	18.4175	26.844	46.9631	101.283
Cervelleite	9.5473	18.5946	26.3036	48.0941	102.54
Cervelleite	8.1751	16.1453	26.3995	49.9529	100.673
Cervelleite	8.5032	16.0502	26.2807	51.3822	102.216
Cervelleite	9.1869	17.9965	27.791	46.9628	101.937
Cervelleite	7.8611	14.187	25.8937	52.9559	100.898
Cervelleite	8.9461	17.2329	28.8394	46.595	101.613
Cervelleite	9.9821	19.1028	28.2118	44.6186	101.915
Cervelleite	8.3172	15.8774	30.2093	47.0431	101.447
Cervelleite	10.3151	19.7047	27.8224	44.4169	102.259
Cervelleite	8.1443	15.7694	29.2696	47.89	101.073
Cervelleite	6.9341	10.1028	26.7093	56.0844	99.8306
Cervelleite	7.4629	10.0333	24.5181	58.0586	100.073
Cervelleite	8.1117	12.3523	25.5946	54.1495	100.208
Cervelleite	7.9276	11.6579	25.3794	54.7094	99.6743
Cervelleite	8.2501	12.4062	25.1687	54.206	100.031
Cervelleite	8.4519	13.8286	26.5205	50.8816	99.6826
Cervelleite	8.5107	14.323	27.377	49.7251	99.9358
Cervelleite	6.9199	10.0892	27.1	55.2981	99.4072
Cervelleite	6.5403	7.945	26.6058	59.0267	100.118
Cervelleite	6.9909	10.3574	27.7065	54.8618	99.9166
Cervelleite	6.202	5.3669	22.6199	63.1763	97.3651
Cervelleite	11.0195	21.3928	24.1685	42.8691	99.4499
Cervelleite	6.0402	4.0655	20.8736	67.9447	98.924
Cervelleite	6.4127	6.3897	22.1609	65.8414	100.805
Cervelleite	8.0273	13.9548	25.2776	54.6822	101.942
Cervelleite	6.5265	8.5798	23.2335	62.7014	101.041
Cervelleite	6.5074	7.6213	22.4762	64.7092	101.314
Cervelleite	6.6624	8.5443	22.8843	63.5066	101.598
Cervelleite	5.7463	4.212	21.1971	68.1479	99.3033
Cervelleite	6.3687	6.7575	22.8804	65.4314	101.438
Cervelleite	5.8897	4.6757	21.9523	68.4814	100.999
Cervelleite	5.8808	4.744	21.6636	69.0128	101.301
Cervelleite	5.6898	4.1209	20.6407	68.6156	99.067
Cervelleite	5.7082	4.2963	21.3428	68.7539	100.101
Cervelleite	7.8356	14.3054	26.0251	53.6701	101.836
Cervelleite	5.6217	4.5958	22.1057	68.3336	100.657
Cervelleite	5.6099	4.6387	20.1872	68.6341	99.0699
Cervelleite	6.8948	10.2263	23.8179	61.4033	102.342
Cervelleite	7.268	11.9162	25.3215	57.7126	102.218
Cervelleite	6.3141	9.0166	25.4299	61.3345	102.095
Cervelleite	8.4257	16.7929	28.0065	48.644	101.869
Cervelleite	5.6645	6.3923	22.4375	63.6099	98.1042
Cervelleite	6.7037	11.7186	24.5165	56.1515	99.0903
Cervelleite	5.7834	4.3697	21.6929	67.73	99.576
Cervelleite	6.3021	4.816	22.3575	67.8076	101.283
Cervelleite	6.1818	4.8942	21.5668	67.5913	100.234
Cervelleite	9.2061	18.1153	28.1256	46.9067	102.354
Cervelleite	9.097	17.681	28.6042	46.8582	102.24
Cervelleite	10.7793	21.2858	26.6028	43.6715	102.339
Cervelleite	7.7494	15.6168	29.232	48.5621	101.16
Cervelleite	10.0952	20.3977	26.9013	44.4021	101.796
Cervelleite	10.65	21.5324	26.2089	43.6174	102.009
Cervelleite	8.93	17.5803	28.2986	47.1937	102.003
Cervelleite	9.048	17.9716	27.8794	46.3205	101.22
Cervelleite	7.9375	15.8065	29.6775	48.4736	101.895
Cervelleite	8.5722	17.0408	27.9397	48.3699	101.923
Cervelleite	8.5418	16.953	27.8403	48.431	101.766
Cervelleite	8.1676	16.4042	28.6466	48.1906	101.409
Cervelleite	8.6427	17.6967	28.2528	47.1605	101.753
Cervelleite	9.0294	17.5126	25.7829	49.518	101.843
Cervelleite	8.6682	17.0813	27.3123	49.2522	102.314
Cervelleite	8.3197	15.704	25.9066	51.7798	101.71
Cervelleite	9.0334	18.1186	27.794	47.6168	102.563
Cervelleite	9.192	18.4023	27.7292	46.7543	102.078
Cervelleite	6.911	14.3193	29.5696	48.2389	99.0388
Cervelleite	8.3974	16.6481	27.1867	50.1271	102.359
Cervelleite	8.9755	18.4606	27.6145	46.8	101.851
Cervelleite	7.9617	15.9976	28.8374	49.2482	102.045
Cervelleite	10.8981	21.8356	26.0386	43.197	101.969
Cervelleite	8.5394	17.3411	28.1961	48.4694	102.546
Cervelleite	9.2109	18.0536	28.0148	46.9998	102.279
Cervelleite	8.2462	16.4806	28.7999	48.6922	102.219
Cervelleite	8.2841	16.3134	28.9785	48.4289	102.005
Cervelleite	8.0441	15.9932	29.6736	48.3436	102.055
Cervelleite	8.2259	16.0532	28.7809	49.5891	102.649
Cervelleite	6.265	6.326	22.9285	64.8845	100.404
Cervelleite	7.108	7.439	22.6746	64.4434	101.665
Cervelleite	6.3705	5.9769	22.4852	66.6064	101.439
Cervelleite	7.6537	11.646	24.0139	57.4877	100.801
Cervelleite	5.4736	3.9335	21.9625	67.4517	98.8213
Cervelleite	7.0617	9.2784	24.0164	61.7299	102.086
Cervelleite	6.0478	4.4708	22.2093	69.0957	101.824
Cervelleite	5.9643	4.6988	21.4454	68.7999	100.908
Cervelleite	6.34	6.1518	22.2804	67.3245	102.097
Cervelleite	6.3295	6.3083	22.1192	66.9472	101.704
Cervelleite	5.5432	4.1422	23.7537	67.3053	100.744
Cervelleite	6.2172	6.8373	22.7393	65.4305	101.224
Cervelleite	6.5834	8.2971	22.5065	64.1115	101.499
Cervelleite	9.3001	18.0528	27.9817	46.0674	101.402
Cervelleite	8.6407	17.3216	28.4625	47.7401	102.165
Cervelleite	9.3549	18.4788	27.6106	46.6513	102.096
Cervelleite	5.6211	4.0251	21.6685	68.992	100.307
Cervelleite	5.5248	4.119	21.4967	69.3499	100.49
Cervelleite	5.9581	5.5581	23.2643	67.1412	101.922
Cervelleite	5.7879	5.351	20.4941	67.6818	99.3148
Cervelleite	5.9236	5.1544	21.2242	68.6024	100.905
Cervelleite	6.5392	7.0262	21.431	66.689	101.685
Cervelleite	5.0191	3.7766	22.1217	69.0641	99.9815
	S	Cu	Se	Sb	Te	Ag	Total
Hessite	0.0551	0.1393	0.0702	0.1996	38.2302	63.9535	102.648
Hessite	0.0638	0.1798	0.0797	0.2048	38.0656	63.059	101.653
Hessite	0.2764	0.6435	0.0438	0.1844	37.4088	62.1168	100.674
Hessite	0.0718	0.1649	0.0907	0.2074	38.1125	61.8923	100.54
Hessite	1.5953	1.4479	0.0767	0.195	35.8222	63.0863	102.223
Hessite	0.0485	0.032	0.0679	0.2389	38.2232	63.3913	102.002
Hessite	0.0575	0.0374	0.0744	0.2534	38.1628	63.5849	102.17
Hessite	0.0762	0.088	0.1103	0.2352	38.2377	63.703	102.45
Hessite	0.0429	0.0455	0.0917	0.2879	38.0978	63.5439	102.11
Hessite	0.0494	0.0569	0.0768	0.2643	37.9312	63.394	101.773
Hessite	0.0611	0.0655	0.1078	0.2326	37.9843	63.2141	101.665
Hessite	0.4688	0.4604	0.1054	0.2624	37.3204	62.8603	101.478
Hessite	0.1592	-0.0741	-0.0631	0.1935	37.694	63.4994	101.409
Sphalerite-rich diagenites
	S	Fe	Cu	Zn	As	Sb	Te	Bi	Total
Tennantite	25.69	0	45.67	4.18	13.43	2.48	8.11	0.44	100
Tennantite	25.73	0.19	44.53	4.03	13.25	2.29	8.4	1.59	100
	S	Se	Pb	Total
Galena	12.94	1.21	85.85	100
	Ag	Au	Total
Native gold	26.29	74.25	100.54
	S	Cu	Ag	Te	Total
Hessite	0.39	0	62.02	37.43	99.84
				2

## Sheet: Aleksandrinskoe
Аleksandrinskoe
Chalcopyrite-rich diagenites
	Se	S	Sb	Te	As	Ag	Hg	Fe	Cu	Zn	Total
Tennantite	0.1	28.69	2.76	0.18	17.58	0.01	0.04	1.27	41.95	9.18	101.76
Tennantite	0.06	28.88	0.98	0.05	19.06	0	0	0.97	42.04	9.01	101.05
Tennantite	0.03	28.58	1.56	0.07	18.36	0.01	0	1.62	42.2	7.98	100.41
Tennantite	0.09	28.62	2.64	0.18	17.67	0.03	0	1.56	42.14	8.09	101.02
Tennantite	0.14	28.58	2.76	0.22	17.69	0	0.03	1.13	41.17	9.56	101.28
Tennantite	0.03	29.18	2.62	0.19	18.53	0.02	0	0.73	43.35	9.21	103.86
Tennantite	0.09	28.78	1	0.05	18.61	0	0.04	0.99	42.56	8.22	100.34
Tennantite	0.08	28.76	2.05	0.13	18.21	0.01	0.02	1.18	42.2	8.75	101.39
	Au	Ag	Cu	Fe	S	Te	Total
Nattive gold	80.01	20.88	0.89	0.41	0.05	0.12	102.36
Nattive gold	79.39	20.67	0.93	0.47	0.18	0.05	101.69
Nattive gold	80.04	21.14	1.64	0.93	0.16	0	103.91
Nattive gold	79.1	20.68	1.51	0.9	0.12	0.08	102.39
Nattive gold	79.11	20.83	1.05	0.54	0.09	0.04	101.66
Nattive gold	78.23	21.67	1.17	0.65	0.24	0	101.96
Bornite-rich diagenites
	S	Fe	Cu	Total
Digenite	20.68	0.37	78.95	100
	21.38	0.5	77.82	99.7
	S	Fe	Cu	Sn	Total
Mawsonite	29.12	12.99	44.61	13.28	100
Mawsonite	29.09	12.75	44.91	13.25	100
	S	Fe	Cu	In	Total
Roquesite-like	26.94	1.22	33.52	37.37	99.06
	Cu	Fe	Ge	As	Zn	S	Sn	Total
Renierite-like	41.33	13.36	5.81	3.08	1.45	32.53	0	97.56
Renierite-like	49.31	11.7	5.04	3.35	0.66	29.39	1.3	100.74
	S	Fe	Cu	Zn	As	Sb	Te	Bi	Total
Tennantite	26.98	0.11	42.93	5.55	16.68	3.44	4.32	0	100
	27.71	0	42.84	5.05	16.99	2.57	4.83	0	100
	27.02	0.22	40.46	6.51	18.42	2.2	1.4	3.79	100
	26.65	0.52	41.46	5.37	16.35	3.03	3.91	2.7	100
	26.67	0.39	42.05	4.75	16.4	2.51	4.87	2.36	100
	Cu	Ag	S	Total
Stromeyerite	29.94	53.02	15.67	98.87	(Tessalina et al.1988)
Stromeyerite	35.88	50.68	15.91	102.69	(Tessalina et al.1988)
Stromeyerite	30.47	51.75	15.78	98.06	(Tessalina et al.1988)
Stromeyerite	31.18	51.66	15.57	99.3	(Tessalina et al.1988)
Stromeyerite	33.05	52.65	15.76	101.75	(Tessalina et al.1988)
Stromeyerite	33.85	51.46	15.62	101.16	(Tessalina et al.1988)
	Cu	Ag	S	Total
Chalcocite	75.21	0.98	22.61	98.97	(Tessalina et al.1988)
Chalcocite	74.73	0.47	22.98	99.6	(Tessalina et al.1988)
Chalcocite	75.82	0.42	22.76	100.3	(Tessalina et al.1988)
Chalcocite	75.37	1.44	22.22	99.1	(Tessalina et al.1988)
Chalcocite	73.22	3.07	21.81	98.27	(Tessalina et al.1988)
	Cu	Ag	S	Total
Covellite	65.52	2.22	31.47	99.53	(Tessalina et al.1988)
Covellite	65.63	1.71	31.24	98.82	(Tessalina et al.1988)
Covellite	65.1	1.64	31.76	98.74	(Tessalina et al.1988)
	Au	Ag	Cu	Fe	Hg	Te	total
Native gold	94.7	5.28	0.06	0.02	-	-	100.05
Native gold	93.78	6.59	0.08	-	-	-	100.45
Native gold	94.41	5.44	0.08	0.01	0.08	-	100.03
Native gold	95.09	5.75	0.1	-	-	0.01	100.95
Native gold	95.46	5.38	0.11	-	-	-	101.03
Native gold	91.32	7.89	0.12	0.02	-	-	99.36
Native gold	95.04	5.5	0.11	-	-	0.06	100.73
Native gold	94.72	6.49	0.07	0.01	-	0.03	101.33
Native gold	94.12	7.01	0.07	-	-	0.01	101.21
Native gold	95.93	5.53	0.26	0.02	-	-	101.77
Native gold	96.13	5.48	0.14	0.01	-	0.01	101.78
Native gold	95.23	5.86	0.05	0.02	-	-	101.18
Sphalerite-rich diagenites
	Cu	Fe	S	As	Sb	Te	Zn	Total
Tennantite	44.1	0.11	26.72	15.45	5.08	1.31	7.52	100.29
Tennantite	44.12	0.61	27.5	18.25	2	0.29	7.77	100.54
Tennantite	43.65	0.57	27.1	18.28	1.91	0.18	8.31	100
Tennantite	43.64	0.07	27.51	17.19	3.12	0.4	7.8	100
Tennantite	43.64	0.03	28.79	17.56	2.65	0.34	8.23	101.24
	Au	Ag	Pb	Te	Total
Native gold	75.11	23.75	0	0	98.86
Native gold	76.46	23.46	0	0	99.92
Native gold	72.12	26	0	0.125	98.245
Native gold	82.77	16.01	0.07	0.05	98.9
Native gold	83.98	15.24	0.275	0	99.495
Native gold	85.4	14.7	0.28	0	100.38
Native gold	85.74	14.37	0	0	100.11
Native gold	85.04	14.47	0	0.03	99.54
Native gold	84.97	15.15	0.05	0	100.17
Native gold	83.44	16.62	0.05	0	100.11
Native gold	83.313	16.074	0.14	0.02	99.547
Native gold	83.97	16.063	0.18	0	100.213
Native gold	83.167	16.358	0	0	99.525
	Ag	Te	S	Au	Total
Hessite	62.48	37.34	0.12	0	99.94
Hessite	61.12	38.81	0.19	0	100.12
Hessite	61.61	37.5	0.11	0	99.22
Hessite	61.52	37.23	0.19	0	98.94
Hessite	57.25	41.54	0.06	0.99	99.84
Hessite	61.61	37.5	0.11	0	99.22
Hessite	57.99	42.56	0.06	0	100.61
Hessite	63.31	37.54	0.1	0	100.95
Hessite	63.47	37.37	0.11	0	100.95
Pyrite-rich diagenites
	S	Fe	Cu	Zn	As	Ag	Sb	Te	Total
tennantite	27.69	4.14	39.18	6.68	17	1.58	3.26	0	99.53
tennantite	27.93	3.79	40.12	6.7	17.28	1.37	2.86	0	100.05
tennantite	27.92	5.24	39.38	5.99	16.95	0.91	2.47	0.32	99.18
tennantite	28.14	3.87	40.04	6.16	16.11	1.2	3.31	0.3	99.13
Barite-rich diagenites
	S	Fe	Cu	Zn	As	Ag	Sb	Total
Tennantite	26.87	0.6	40.25	7.49	13.62	1.47	9.11	99.42
Tennantite	26.71	0.76	40.92	7.18	14.36	1.29	8.34	99.56
Tennantite	26.46	0.47	39.99	7.53	12.8	1.55	10.7	99.5
Tennantite	26.71	0.63	40.6	7.24	12.99	1.6	10.15	99.92
Tennantite	26.63	0.61	41	7.44	13.16	1.59	9.56	99.99
Tennantite	27.16	0.63	40.47	7.54	13.98	1.51	8.1	99.38
	Au	Ag	Total
Native gold	75.11	23.75	98.86
Native gold	76.46	23.46	99.92
Native gold	82.77	16.01	98.78
Native gold	83.98	15.24	99.22
Native gold	85.4	14.7	100.1
Native gold	85.74	14.37	100.11
Native gold	85.04	14.47	99.51
Native gold	84.97	15.15	100.12
Native gold	83.31	16.62	99.93
Native gold	83.97	16.06	100.03
Native gold	83.17	16.36	99.53
Native gold	82.78	16.85	99.63
Native gold	71.68	28.71	100.39
Native gold	72.68	27.8	100.48
Native gold	77.1	23.8	100.9
Native gold	78.72	21.53	100.25
Native gold	78.44	21.42	99.86
Native gold	66.8	32.73	99.53
Native gold	66.91	32.81	99.72
Native gold	76.94	23.2	100.14
Native gold	76.61	23.41	100.02
Native gold	81.56	19.32	100.88
Native gold	80.54	20.04	100.58
Native gold	80.09	20.82	100.91
Hematite-rich diagenites
	Bi	Te	Ag	Se	S	Total
Tetradymite	58.46	37.06	0	0	4.48	100
Tetradymite	57.81	36.91	0.3	0.55	4.42	99.99
Tetradymite	57.54	36.68	1.07	0.66	4.05	100
Tetradymite	57.6	37.41	0.39	0	4.6	100
Tetradymite	58.19	37.25	0	0	4.56	100
	Bi	Te	Ag	Se	Pb	Total
Tsumoite	55.95	39.15	0	0	4.9	100
Tsumoite	53.68	35.51	2.49	0.53	7.79	100
	Bi	Te	Pb	Total
Rucklidgeite	36.82	41.55	18.27	96.64
	Bi	Te	Ag	Se	Pb	Total
Phase of ruckidgeite group	39.24	28.43	2.47	1.11	28.75	100

## Sheet: Saf'yanovskoe
Saf’yanovskoe
Sphalerite-rich diagenites
	Au	Ag	Total
Native gold	50.55	48.45	99
	51.45	47.85	99.3
	Cu	Fe	Zn	Ag	Co	Te	As	Sb	S	Total	(Safina, Maslennikov, 2009)
Tennantite	42.96	2.72	7.01	0	0	0.97	10.49	9	26.76	99.91	(Safina, Maslennikov, 2009)
Tennantite	41.77	2.34	7.44	0	0.22	0	10.67	9.88	27.67	99.99	(Safina, Maslennikov, 2009)
Tennantite	36.69	6.17	6.47	0.21	1.55	0.56	11.73	11.09	25.4	99.87	(Safina, Maslennikov, 2009)
Tennantite	41.55	2.24	7.04	0.09	0	0	10.8	10.4	27.22	99.34	(Safina, Maslennikov, 2009)
Tennantite	41.99	2.16	7.21	0.16	0	0.83	8.78	12.28	26.54	99.95	(Safina, Maslennikov, 2009)
Tennantite	39.27	6.14	6.18	0	0.37	0.39	8.77	11.59	27.21	99.92	(Safina, Maslennikov, 2009)
Tennantite	39.22	5.7	6.99	0	0	0	11.02	8.4	28.52	99.85	(Safina, Maslennikov, 2009)
Tennantite	35.58	7.93	6.43	0	0	0	9.36	7.75	32.85	99.9	(Safina, Maslennikov, 2009)
	Cu	Fe	Zn	As	Sb	S	Total	(Safina, Maslennikov, 2009)
Enargite	47.18	2.95	0.15	13.1	3.91	32.54	99.83	(Safina, Maslennikov, 2009)
Enargite	46.92	3.51	0.29	12.86	3.57	32.55	99.7	(Safina, Maslennikov, 2009)
Enargite	45.97	3.83	0.07	13.4	3.93	32.69	99.89	(Safina, Maslennikov, 2009)
Enargite	46.58	4.87	0.11	15.21	0.66	32.17	99.6	(Safina, Maslennikov, 2009)
Enargite	46.83	3.02	2.97	15.19	0	31.9	99.91	(Safina, Maslennikov, 2009)
Enargite	45.49	4.79	1.08	14.44	0.5	33.54	99.84	(Safina, Maslennikov, 2009)
Enargite	45.15	2.69	2.73	13.32	4.71	31.32	99.92	(Safina, Maslennikov, 2009)
Enargite	49.3	2.9	0	14.7	1.42	31.48	99.98	(Safina, Maslennikov, 2009)
Pyrite-rich diagenites with sphalerite
	Cu	Sb	Pb	Zn	Fe	S	Total
Bournonite	11.84	23.1	43.87	0.35	0.43	20.26	99.84	(Safina, Ayupova, 2017)
Bournonite	12.15	23.8	42.05	0.2	0.3	20.09	98.59	(Safina, Ayupova, 2017)
Bournonite	11.96	24.52	43.12	0.16	0.33	20.01	100.09	(Safina, Ayupova, 2017)
Bournonite	11.99	25.06	42.8	0.15	0.29	20.07	100.36	(Safina, Ayupova, 2017)
Bournonite	12.23	23.18	43.92	0.13	0.41	19.38	99.26	(Safina, Ayupova, 2017)
Bournonite	11.87	22.75	43.68	0.16	0.26	19.47	98.18	(Safina, Ayupova, 2017)
Bournonite	12.74	23.47	43.09	0.17	0.46	20.17	100.08	(Safina, Ayupova, 2017)
Bournonite	12.8	23.06	44.87	0.22	0.48	19.59	101.02	(Safina, Ayupova, 2017)
Bournonite	13.14	22.79	44	0.69	0.3	19.85	100.78	(Safina, Ayupova, 2017)
Bournonite	13.08	22.2	44.36	0.11	0.32	19.74	99.82	(Safina, Ayupova, 2017)
Bournonite	12.56	22.62	44.62	0.12	0.32	19.31	99.55	(Safina, Ayupova, 2017)
Bournonite	12.62	22.21	43.37	0.38	0.78	19.24	98.6	(Safina, Ayupova, 2017)
Bournonite	13.26	22.31	42.34	0.5	0.52	19.28	98.22	(Safina, Ayupova, 2017)
	Cu	Sb	Pb	Fe	As	S	Total
Enargite	45.09	0.29	1.82	1.32	18.72	32.6	99.84	(Safina, Ayupova, 2017)
Enargite	41.9	0.29	5.24	2.26	17.27	32.54	99.65	(Safina, Ayupova, 2017)
Enargite	42.17	-	4.93	0.99	18.7	32.82	99.61	(Safina, Ayupova, 2017)
Enargite	43.49	-	5.57	0.95	17.33	32.64	99.98	(Safina, Ayupova, 2017)
Enargite	44.5	6.92	-	1.87	14.4	31.56	99.25	(Safina, Ayupova, 2017)
Enargite	45.07	5.77	-	1.99	15.18	31.87	99.88	(Safina, Ayupova, 2017)
Enargite	45.41	5.83	-	1.95	14.6	31.69	99.48	(Safina, Ayupova, 2017)
Enargite	44.53	6.52	-	2.25	14.7	31.59	99.59	(Safina, Ayupova, 2017)
Enargite	44.57	5.24	-	2.58	15.19	32.12	99.7	(Safina, Ayupova, 2017)
	Cu	Sb	Zn	Fe	As	S	Total
Tennantite	39.96	2.26	9.51	1	19.44	26.9	99.07	(Safina, Ayupova, 2017)
Tennantite	39.84	0.77	9.79	1.03	20.68	26.52	98.63	(Safina, Ayupova, 2017)
Tennantite	40.93	0.1	8.56	1.17	20.48	28.31	99.44	(Safina, Ayupova, 2017)
Tennantite	40.38	0.1	8.6	2.03	20.52	27.43	99.05	(Safina, Ayupova, 2017)
Tennantite	40.64	0.1	8.51	2.01	21.45	27.53	100.14	(Safina, Ayupova, 2017)
Tennantite	40.33	0.53	8.74	1.26	20.76	27.54	99.14	(Safina, Ayupova, 2017)
Tennantite	40.45	1.9	8.8	1.07	20.96	27.21	100.39	(Safina, Ayupova, 2017)
	Cu	Sb	Zn	Fe	As	S	Total
Tennantite-tetrahedrite	38.16	15.95	8.6	0.79	11.52	25.35	100.37	(Safina, Ayupova, 2017)
Tennantite-tetrahedrite	38.25	14.67	8.43	0.99	12.13	25.82	100.28	(Safina, Ayupova, 2017)
	Cu	Sb	Fe	As	S	Total
Famatinite	39.67	24.07	2.04	3.82	29.17	98.77	(Safina, Ayupova, 2017)
Famatinite	41.28	23.86	1.56	4.01	28.81	99.52	(Safina, Ayupova, 2017)
Famatinite	40.24	18.02	1.82	8.23	31.02	99.33	(Safina, Ayupova, 2017)
Barite-rich diagenites
	S	Fe	Cu	Zn	As	Ag	Sb	Total
Tennantite	26.85	0.51	41.7	7.25	15.67	0.92	6.58	99.48
	S	Fe	Cu	As	Ag	Sb	Total
Enargite	32.11	0.72	47.17	17.56	0.4	1.41	99.37
Enargite	32.39	0.45	47.93	18.29	0.27	0.22	99.55
Enargite	32.31	0.45	47.97	18.14	0.26	0.22	99.36
Enargite	32.14	0	48.29	18	0	0.83	99.25
Enargite	32.24	0	48.04	18.23	0.29	0.56	99.36
Enargite	32.36	0	47.78	18.63	0.32	0.38	99.47
